# Mice that lack activity of $\alpha\text{v}\beta 6$ - and $\alpha\text{v}\beta 8$ -integrins reproduce the abnormalities of *Tgfb1*- and *Tgfb3*-null mice

Poshala Aluwihare<sup>1</sup>, Zhenyu Mu<sup>1</sup>, Zhicheng Zhao<sup>1</sup>, Dawen Yu<sup>1</sup>, Paul H. Weinreb<sup>2</sup>, Gerald S. Horan<sup>2</sup>, Shelia M. Violette<sup>2</sup> and John S. Munger<sup>1,\*</sup>

<sup>1</sup>Department of Cell Biology, New York University School of Medicine, New York, NY 10016, USA

<sup>2</sup>Biogen Idec, Cambridge, MA 02142, USA

\*Author for correspondence (e-mail: john.munger@nyumc.org)

Accepted 14 September 2008

Journal of Cell Science 122, 227–232 Published by The Company of Biologists 2009

doi:10.1242/jcs.035246

## Summary

The arginine-glycine-aspartate (RGD)-binding integrins  $\alpha\text{v}\beta 6$  and  $\alpha\text{v}\beta 8$  activate latent TGF $\beta$ 1 and TGF $\beta$ 3 in vivo, but it is uncertain whether other RGD-binding integrins such as integrins  $\alpha\text{v}\beta 5$  and  $\alpha\text{v}\beta 3$  activate these TGF $\beta$  isoforms. To define the combined role of  $\alpha\text{v}\beta 6$ - and  $\alpha\text{v}\beta 8$ -integrin in TGF $\beta$  activation, we analyzed mice lacking function of both integrins by means of gene deletion and/or pharmacologic inhibition. Most *Itgb6*<sup>−/−</sup>; *Itgb8*<sup>−/−</sup> embryos die at mid-gestation; those that survive develop cleft palate – as observed in *Tgfb3*<sup>−/−</sup> mice. *Itgb8*<sup>−/−</sup> mice treated with an anti- $\alpha\text{v}\beta 6$ -integrin antibody develop severe autoimmunity and lack Langerhans cells –

similar to *Tgfb1*-null mice. These results support a model in which TGF $\beta$ 3-mediated palate fusion and TGF $\beta$ 1-mediated suppression of autoimmunity and generation of Langerhans cells require integrins  $\alpha\text{v}\beta 6$  and  $\alpha\text{v}\beta 8$  but not other RGD-binding integrins as TGF $\beta$  activators.

Supplementary material available online at <http://jcs.biologists.org/cgi/content/full/122/2/227/DC1>

Key words: Autoimmunity, Integrins, Langerhans cells, Palate fusion, TGF $\beta$

## Introduction

The TGF $\beta$  cytokines (TGF $\beta$ 1, TGF $\beta$ 2 and TGF $\beta$ 3) have multiple effects on a wide range of cell types. Knockout of the gene encoding TGF $\beta$ 1 (*Tgfb1*<sup>−/−</sup>) causes incompletely penetrant defects in embryonic vascular development and a lethal autoimmune syndrome driven by activated CD4<sup>+</sup> T cells (Shull et al., 1992; Kulkarni et al., 1993). *Tgfb2*<sup>−/−</sup> mice have developmental defects in the skeletal, cardiac and genitourinary systems, and *Tgfb3*<sup>−/−</sup> mice have cleft palate and variable abnormal lung development (Sanford et al., 1997; Kaartinen et al., 1995; Proetzel et al., 1995).

Processing of the TGF $\beta$  pro-protein produces a noncovalent complex between the TGF $\beta$  pro-peptide (called latency-associated peptide, LAP) and TGF $\beta$  (Annes et al., 2003). The association of LAP with TGF $\beta$  has to be altered or eliminated before TGF $\beta$  can engage TGF $\beta$  receptors. TGF $\beta$  activators include proteases that degrade LAP and molecules that nonproteolytically disrupt the latent complex, such as thrombospondin-1 and integrins  $\alpha\text{v}\beta 6$  and  $\alpha\text{v}\beta 8$  (Kojima et al., 1993; Yu and Stamenkovic, 2000; Annes et al., 2003; Mu et al., 2002; Munger et al., 1999).

Integrins  $\alpha\text{v}\beta 6$  and  $\alpha\text{v}\beta 8$  are two of eight integrins that recognize the tri-peptide sequence arginine-glycine-aspartate (RGD) (Hynes, 2002). Both activate TGF $\beta$ 1 and TGF $\beta$ 3 through interaction with an RGD sequence present in TGF $\beta$ 1-LAP and TGF $\beta$ 3-LAP; the propeptide of TGF $\beta$ 2 does not have an RGD sequence (Munger et al., 1999; Annes et al., 2002; Mu et al., 2002; Araya et al., 2006). Mice that lack  $\alpha\text{v}\beta 6$  integrin (*Itgb6*<sup>−/−</sup>) have inflammatory infiltrates in skin and lungs, emphysema due to upregulated MMP12 expression in alveolar macrophages, reduced numbers of Langerhans cells (LCs) and altered lung surfactant

metabolism. All of these abnormalities are indicative of reduced TGF $\beta$  signaling (Huang et al., 1996; Morris et al., 2003; Yang et al., 2007; Koth et al., 2007). Whereas *Itgb6*<sup>−/−</sup> embryos are normal, some *Itgb8*<sup>−/−</sup> embryos die at about embryonic day 10 (E10) because of vasculogenesis failure in the yolk sac, similar to *Tgfb1*<sup>−/−</sup> mice (Zhu et al., 2002). Of the surviving *Itgb8*<sup>−/−</sup> embryos, ~10% have cleft palate. *Itgb8*<sup>−/−</sup> embryos that escape early embryonic death have abnormal brain vascular morphogenesis (Zhu et al., 2002), and mice with homozygous loss-of-function mutations in both *Tgfb1* and *Tgfb3* have similar brain vascular defects (Mu et al., 2008).

Mice with a knock-in mutation of *Tgfb1* that inactivates the integrin-binding site in TGF $\beta$ 1-LAP (RGD changed to RGE) duplicate the phenotype of *Tgfb1*<sup>−/−</sup> mice (Yang et al., 2007). Thus, RGD-binding integrins are required for TGF $\beta$ 1 activation in early life. In addition to integrins  $\alpha\text{v}\beta 6$  and  $\alpha\text{v}\beta 8$ , the RGD-binding integrins  $\alpha\text{v}\beta 1$ ,  $\alpha\text{v}\beta 3$ ,  $\alpha\text{v}\beta 5$  and  $\alpha 8\beta 1$  bind TGF $\beta$ 1-LAP and, in the case of integrin  $\alpha\text{v}\beta 3$ , also TGF $\beta$ 3-LAP (Sheppard, 2005; Munger et al., 1999; Lu et al., 2002; Ludbrook et al., 2003; Munger et al., 1998). Evidence suggests that, under certain circumstances, integrins  $\alpha\text{v}\beta 3$  and  $\alpha\text{v}\beta 5$  activate latent TGF $\beta$ 1 (Asano et al., 2005a; Asano et al., 2005b; Wipff et al., 2008). Therefore, it is not clear which RGD-binding integrins are relevant to the phenotype of *Tgfb1*<sup>RGE/RGE</sup> mice. To better define the RGD-binding integrins required for TGF $\beta$ 1 and TGF $\beta$ 3 activation, we analyzed mice that lack the function of the two best-characterized TGF $\beta$ -activating integrins,  $\alpha\text{v}\beta 6$  and  $\alpha\text{v}\beta 8$ . We did this by generating mice homozygous for null mutations in both *Itgb6* and *Itgb8*, and by pharmacologically inhibiting integrin  $\alpha\text{v}\beta 6$  in *Itgb8*<sup>−/−</sup> mice.

## Results and Discussion

The originally described *Itgb8*<sup>-/-</sup> mice (C57BL/6J + 129/Sv genetic background) died at or before birth (Zhu et al., 2002). After being backcrossed to the ICR background, however, *Itgb8*<sup>-/-</sup> mice had a median survival of ~2 months despite being born with brain hemorrhage, making it possible to assess the effect of complete loss of integrin  $\alpha\text{v}\beta 8$  in adult mice. At birth, these *Itgb8*<sup>-/-</sup> mice were present at the expected Mendelian ratio (data not shown). The external appearance of hemorrhage disappeared after the first week, and brains of 2-week-old mice that were examined histologically showed normal vasculature and no hemorrhage. *Itgb8*<sup>-/-</sup> mice are ~60% smaller than control littermates (Fig. 1A). Cleft palate was observed once among ~100 newborn knockout mice.

We observed 17 adult *Itgb8*<sup>-/-</sup> mice until death occurred naturally or until their morbidity required sacrifice (see Table 1). In most of mice, weakness (particularly in the hindlimbs) developed at 7–10 weeks of age, and the mice became moribund as they lost mobility. This is similar to mice with a conditional deletion of *Itgav* in the central nervous system; those mice are born with brain hemorrhage but survive and develop axonal deterioration in the spinal cord and cerebellum, leading to ataxia and loss of hindlimb coordination (McCarty et al., 2005). Two *Itgb8*<sup>-/-</sup> mice developed rectal prolapse, and two *Itgb8*<sup>-/-</sup> mice developed localized infections (pyometra and periorbital abscess in one mouse each); occasional abscesses were also reported in *Smad3*-null mice (Yang et al., 1999). Histological examination of adult *Itgb8*<sup>-/-</sup> mice (lung, heart, liver, spleen, kidney, bladder, brain, thymus, pancreas, stomach, colon) showed no abnormalities aside from the above sporadic abnormalities. Mice with a conditional deletion of *Itgb8* in hematopoietic cells or, specifically, in dendritic cells develop a late-onset autoimmune syndrome, characterized by splenomegaly, hepatitis and colitis with death between 4 and 10 months of age (Travis et al., 2007). However, we found no splenomegaly, hepatitis or colitis in adult *Itgb8*<sup>-/-</sup> mice, which all died before 4 months of age (Fig. 1B).

We next crossed *Itgb8*<sup>+/-</sup> mice with mice bearing a null allele for *Itgb6* and identified *Itgb8*<sup>+/-</sup>;*Itgb6*<sup>+/-</sup> mice for breeding. Embryonic lethality for the *Itgb8*<sup>+/-</sup>;*Itgb6*<sup>+/-</sup> genotype was high. Of 327 neonates from *Itgb8*<sup>+/-</sup>;*Itgb6*<sup>+/-</sup> parents, only three (1%) were *Itgb8*<sup>-/-</sup>;*Itgb6*<sup>-/-</sup>, indicating that ~85% of *Itgb8*<sup>-/-</sup>;*Itgb6*<sup>-/-</sup> embryos died before birth (see supplementary material Table S1). Two of the three *Itgb8*<sup>+/-</sup>;*Itgb6*<sup>+/-</sup> neonates had cleft palate without other craniofacial abnormalities, as occurs in *Tgfb3*<sup>-/-</sup> and *Itgav*<sup>-/-</sup> mice (Fig. 2). Cleft palates occurred in one of 14 *Itgb8*<sup>-/-</sup>;*Itgb6*<sup>+/-</sup> mice, but in none of the 16 *Itgb8*<sup>+/-</sup>;*Itgb6*<sup>+/-</sup> neonates or in any other neonates in these litters. Thus, integrins  $\alpha\text{v}\beta 6$  and  $\alpha\text{v}\beta 8$  appear to be crucial for palate formation but, because the penetrance of cleft palate was not 100% in this small sample, there might be a role for other TGF $\beta$ 3 activators in this process. Histologic findings in *Itgb8*<sup>-/-</sup>;*Itgb6*<sup>-/-</sup> neonates were otherwise unremarkable, with the exception of the lungs, which appeared to have a slight delay in alveolar development. However, because these changes might be due to respiratory distress (Proetzel et al., 1995), and because of the small number of samples, we cannot conclude that lung development is abnormal in these mice. However, lung development is abnormal in some *Tgfb3*<sup>-/-</sup> mice (Karttinen et al., 1995; Proetzel et al., 1995) but is normal in *Itgav*-null mice (Bader et al., 1998), which lack  $\alpha\text{v}\beta 6$ -,  $\alpha\text{v}\beta 8$ - and three other  $\alpha\text{v}$ -integrins.

To assess the effect of the lack of integrins  $\alpha\text{v}\beta 6$  and  $\alpha\text{v}\beta 8$  on immune function in older mice, we treated *Itgb8*<sup>-/-</sup> mice with murine mAb 6.3G9, a specific inhibitor of integrin  $\alpha\text{v}\beta 6$  (Weinreb et al., 2004). To avoid interfering with palate fusion, we started treatment

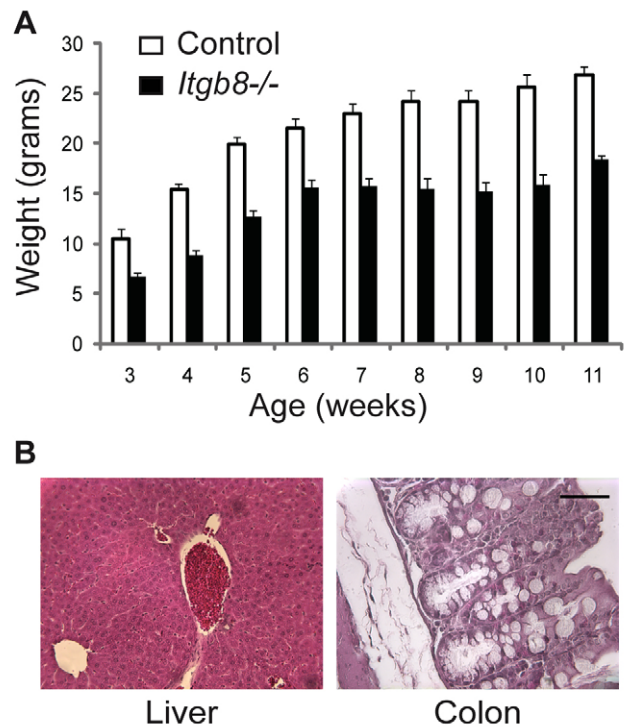

**Fig. 1.** Phenotype of adult *Itgb8*<sup>-/-</sup> mice. (A) *Itgb8*<sup>-/-</sup> mice are smaller than control mice. White bars show control weights ( $n=13$ ), black bars show *Itgb8*<sup>-/-</sup> weights ( $n=14$ ). Error bars represent the s.e.m. (B) Representative hematoxylin- and eosin-stained sections of liver and colon of *Itgb8*<sup>-/-</sup> mice (9 weeks of age, original magnification 400 $\times$ ) demonstrate lack of inflammation. Scale bar: 100  $\mu\text{m}$ .

**Table 1. Findings in 17 *Itgb8*<sup>-/-</sup> adult mice**

| Age at death (days) | Observations                         | Cause of death |
|---------------------|--------------------------------------|----------------|
| 21                  | Impaired mobility                    | D              |
| 25                  | Impaired mobility                    | D              |
| 26                  | Impaired mobility                    | D              |
| 35                  | Impaired mobility                    | D              |
| 40                  | Rectal prolapse, periorbital abscess | S              |
| 56                  | Weakness in hind limbs               | S              |
| 60                  | Impaired mobility                    | D              |
| 62                  | Impaired mobility                    | D              |
| 65                  | Rectal prolapse                      | S              |
| 65                  | Weakness in hind limbs               | S              |
| 66                  | Sparse hair                          | D              |
| 72                  | Weakness in hind limbs               | S              |
| 72                  | Impaired mobility                    | D              |
| 72                  | Genital prolapse                     | S              |
| 72                  | Immobile                             | S              |
| 86                  | Weakness in hind limbs, pyometra     | S              |
| 92                  | Impaired mobility                    | D              |
| 74                  | Weakness in hind limbs               | S              |

*Itgb8*<sup>-/-</sup> mice were observed until death or until sacrifice was required because of morbidity (which was most often due to poor mobility and inability to feed).

D, natural death; S, sacrificed.

after palate fusion, which occurs at E15, and protocols differed regarding the time the treatments were started (see Table 2). All injections were 10 mg/kg, a dose that produces an essentially complete inhibition of integrin  $\alpha\text{v}\beta 6$  (Horan et al., 2007; Puthawala et al., 2008).

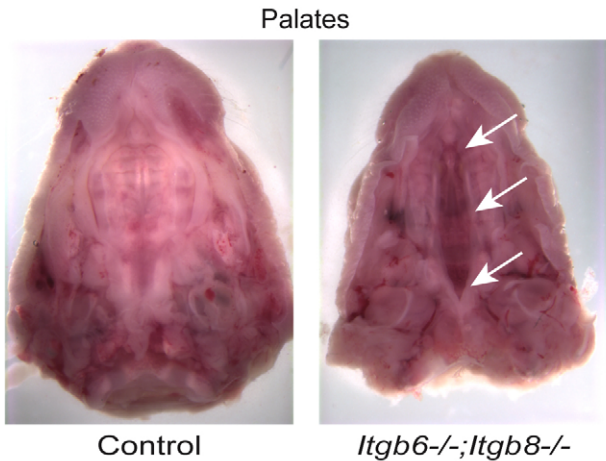

**Fig. 2.** Cleft palate in *Itgb6*<sup>-/-</sup>;*Itgb8*<sup>-/-</sup> neonates. The control sample shows normally fused palatal shelves, whereas the *Itgb6*<sup>-/-</sup>;*Itgb8*<sup>-/-</sup> sample demonstrates a cleft of the secondary palate. Arrows indicate cleft palate.

When integrin  $\alpha\text{v}\beta 6$  inhibition was initiated before birth (E16.5) or at birth [referred to as postnatal day 0 (P0)] (see Table 2, groups 1 or 2, respectively), mice became moribund or died between days 11 and 26 (Fig. 3A). In all cases, littermates that were non-knockout (non-KO), i.e. *Itgb8*<sup>+/-</sup> or *Itgb8*<sup>+/+</sup>, and had been treated with the same antibody regimen appeared healthy at the time of the demise of the 6.3G9-treated *Itgb8*<sup>-/-</sup> mice. All 6.3G9-treated *Itgb8*<sup>-/-</sup> mice had extensive mononuclear cell infiltrates in heart, lung, liver, stomach and pancreas (Fig. 3B). Similarly to *Tgfb1*<sup>-/-</sup> and *Tgfb1*<sup>RGE/RGE</sup> mice, they also lacked LCs, a subtype of dendritic cell in the epidermis (Fig. 3C) (Borkowski et al., 1996; Yang et al., 2007). By contrast, non-KO littermates that had been treated with 6.3G9 and were sacrificed in parallel had epidermal LCs and showed no signs of inflammation except in the lungs of half the treated animals (consistent with loss of integrin  $\alpha\text{v}\beta 6$  function). The survival of these 6.3G9-treated *Itgb8*<sup>-/-</sup> mice (Fig. 3A) was slightly shorter than that reported for *Tgfb1*<sup>-/-</sup> and *Tgfb1*<sup>RGE/RGE</sup> mice (Kulkarni et al., 1993; Yang et al., 2007), most of which die between 3 and 4 weeks of age.

In four additional *Itgb8*<sup>-/-</sup> mice, 6.3G9 treatment was started on P3 (Table 1, group 3). The survival of these mice was indistinguishable from that of untreated *Itgb8*<sup>-/-</sup> mice (Fig. 3A). Inflammatory changes were less marked: whereas all four mice had lung inflammation, consistent with inhibition  $\alpha\text{v}\beta 6$  integrin, only

two of four had gastric inflammation or inflammation of the liver, and none had inflammation of the pancreas or heart.

Mice that lack Foxp3, a transcription factor that specifies regulatory T cell lineage (Treg), develop autoimmunity similar to that in *Tgfb1*<sup>-/-</sup> mice, which suggests a role for TGF $\beta$ 1 in Treg development and/or function (Fontenot et al., 2003). Thymus-derived Tregs are generated in a TGF $\beta$ 1-independent manner because they are present in *Tgfb1*<sup>-/-</sup> mice (Marie et al., 2005) and in mice whose type 2 TGF $\beta$  receptor (TGF $\beta$ R2) is conditionally deleted in CD4<sup>+</sup> cells (Marie et al., 2006). By contrast, TGF $\beta$ 1 deficiency causes increased proliferation and decreased survival of peripheral or ‘adaptive’ Tregs (Sakaguchi, 2004; Wan and Flavell, 2007; Marie et al., 2006; Rubtsov and Rudensky, 2007).

We quantified Tregs in 6.3G9-treated *Itgb8*<sup>-/-</sup> mice and in non-KO control mice at P8, when significant numbers of thymic Tregs are found in wild-type mice (Fontenot et al., 2005). Inhibition of  $\alpha\text{v}\beta 6$  integrin was initiated before birth, as in Group 1 (see Table 2). Thymic and splenic Tregs in 6.3G9-treated *Itgb8*<sup>-/-</sup> mice were not reduced, as also observed in *Tgfb1*<sup>RGE/RGE</sup> mice (Fig. 3D) (Yang et al., 2007). The 6.3G9-treated *Itgb8*<sup>-/-</sup> mice did not show histological evidence of inflammation at P8 (data not shown). P17 mice were evaluated in studies that demonstrated reduced numbers of splenic Tregs in TGF $\beta$ 1-deficient mice (Marie et al., 2006; Rubtsov and Rudensky, 2007), which might explain the different result in our study.

Travis and colleagues have shown that conditional loss of  $\alpha\text{v}\beta 8$  integrin in all leukocytes or, specifically, in dendritic cells causes autoimmunity (Travis et al., 2007). These experiments were performed by crossing mice with a floxed *Itgb8* allele with mice that expressed Cre recombinase under the control of either the *Vav1* or CD11c (*Itgax*) promoter. In both cases, a wasting syndrome with inflammation in the colon and the portal triads of the liver began at ~4–5 months of age. Death occurred naturally or when their morbidity required sacrifice, in most cases after 6 months of age. In unpublished work, this group also generated *Itgb6*<sup>-/-</sup>;*(Vav1-cre)Itgb8*<sup>fl/fl</sup> mice. These mice had a similar wasting and autoimmune syndrome, but with an accelerated course, with death occurring by 23 weeks (personal communication, Dean Sheppard, UCSF, San Francisco, CA, and Mark Travis, University of Manchester, UK). Neither of these inflammatory phenotypes is as severe as in TGF $\beta$ 1-deficient or 6.3G9-treated *Itgb8*<sup>-/-</sup> mice. Together, these observations and our findings suggest that expression of  $\alpha\text{v}\beta 8$  integrin by both dendritic cells and non-immune cells, in combination with  $\alpha\text{v}\beta 6$  integrin, is needed to prevent excessive

**Table 2. Pharmacological blockage of  $\alpha\text{v}\beta 6$  integrin in mice**

| Mice group                      | Genotype                    | Antibody      | n  | Result                                                                    |
|---------------------------------|-----------------------------|---------------|----|---------------------------------------------------------------------------|
| 1 (treatments started at E16.5) | <i>Itgb8</i> <sup>-/-</sup> | 6.3G9         | 12 | Death at days 11–22; multi-organ inflammation in all                      |
|                                 | Non-KO                      | 6.3G9         | 12 | Littermates sacrificed in parallel; lung inflammation only                |
|                                 | <i>Itgb8</i> <sup>-/-</sup> | Control (1E6) | 2  | Sacrificed at weeks 6.5 and 9 – no inflammation                           |
|                                 | Non-KO                      | Control (1E6) | 2  | Sacrificed at weeks 6.5 and 9 – no inflammation                           |
| 2 (treatments started at P0)    | <i>Itgb8</i> <sup>-/-</sup> | 6.3G9         | 8  | Death at days 11–26; multi-organ inflammation in all                      |
|                                 | Non-KO                      | 6.3G9         | 8  | Littermates sacrificed in parallel; lung inflammation only                |
|                                 | <i>Itgb8</i> <sup>-/-</sup> | Control (1E6) | 3  | One mouse death at day 25, two mice sacrificed at day 25; no inflammation |
|                                 | Non-KO                      | Control (1E6) | 3  | Sacrificed at day 25; no inflammation                                     |
| 3 (treatments started at P3)    | <i>Itgb8</i> <sup>-/-</sup> | 6.3G9         | 4  | Death at days 35–101; variable inflammation                               |
|                                 | Non-KO                      | 6.3G9         | 4  | Littermates sacrificed in parallel; lung inflammation only                |

Mice groups 1, 2 and 3, three protocols used to treat mice with either mAb 6.3G9 against  $\alpha\text{v}\beta 6$  integrin or mAb 1E6 (control). Group 1 mice were treated prenatally by injecting pregnant females with 10 mg/kg of 6.3G9 (or control antibody) on E16.5 and E18.5, and then postnatally beginning on P3 and continuing weekly. Group 2 mice were first injected on the day of birth (P0) and then weekly. Group 3 mice were first injected on P3 and then weekly.



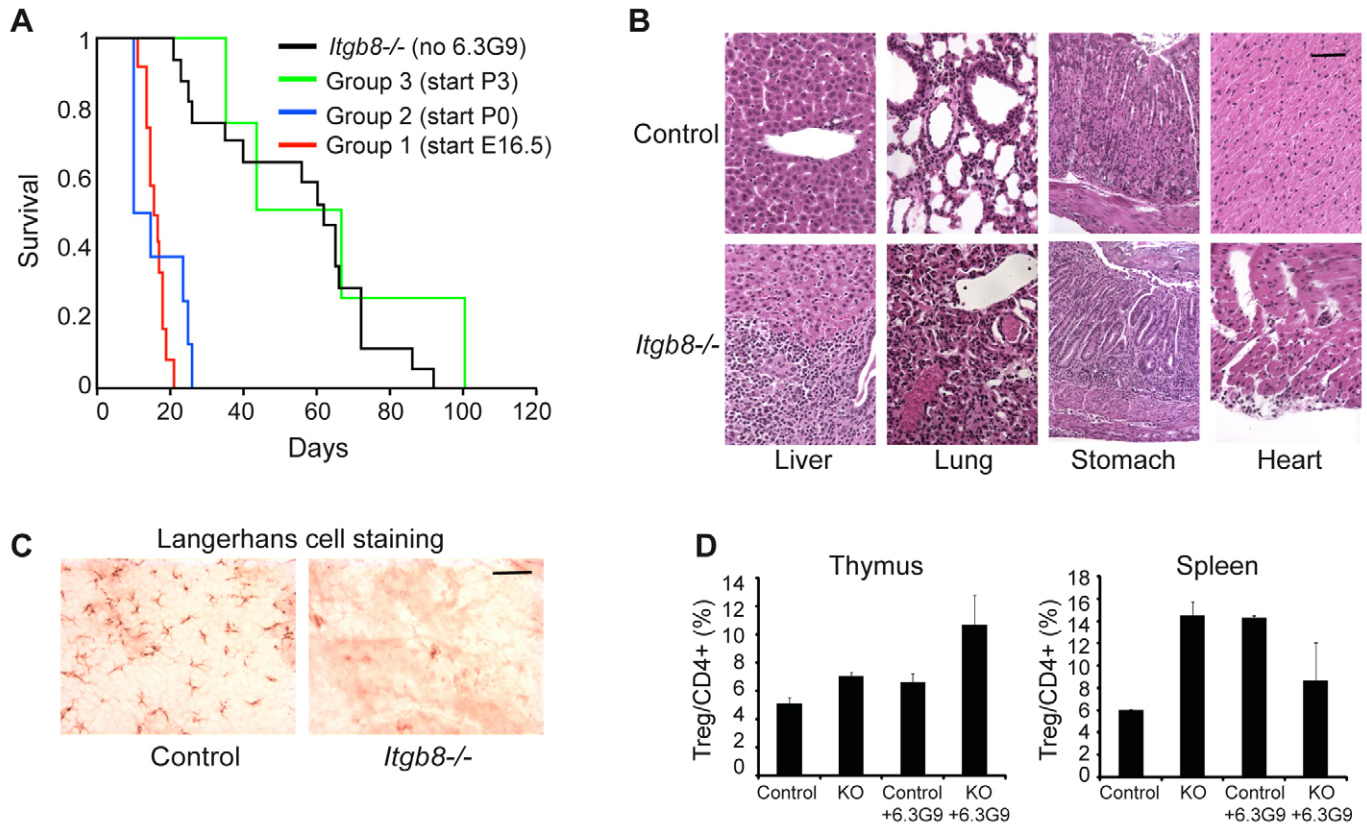

**Fig. 3.** (A) Kaplan-Meier survival curves for *Itgb8*<sup>-/-</sup> mice ( $n=17$ ), *Itgb8*<sup>-/-</sup> mice with 6.3G9 treatment starting at P3 ( $n=4$ ), *Itgb8*<sup>-/-</sup> mice with 6.3G9 treatment starting at P0 ( $n=8$ ), and *Itgb8*<sup>-/-</sup> mice with 6.3G9 treatment starting at E16.5 ( $n=12$ ). (B) Hematoxylin and eosin staining of liver, lung, stomach and heart of representative *Itgb8*<sup>-/-</sup> and littermate non-KO control mice treated with 6.3G9 starting at E16.5 and sacrificed at 19 days. (C) *Itgb8*<sup>-/-</sup> mice treated with 6.3G9 starting at E16.5 lack Langerhans cells (LCs). Representative examples of epidermal sheets stained with an antibody that recognizes LCs. (D) Tregs isolated from thymus and spleen were identified by staining for FOXP3. Cells are from control mice, *Itgb8*<sup>-/-</sup> mice, and control and *Itgb8*<sup>-/-</sup> mice treated with 6.3G9 starting at E16.5. ( $n=3-4$  for thymus,  $n=3$  for spleen). Error bars represent the s.e.m. Scale bar: 100  $\mu$ m.

lymphocyte activation.  $\alpha\beta 8$  integrin is widely expressed on many non-immune cell types, such as neurons, fibroblasts and epithelial cells (Zhu et al., 2002; Araya et al., 2007; Nishimura et al., 1998; Proctor et al., 2005).

6.3G9-treated *Itgb8*<sup>-/-</sup> mice have a shorter survival time than *Tgfb1*<sup>-/-</sup> and *Tgfb1*<sup>RGE/RGE</sup> mice. The reasons for this are not known. The genetic background might be responsible. In addition, the mice might be physiologically impaired because of brain hemorrhage and low body weight. It is also possible that TGF $\beta$ 3, which is activated by  $\alpha\beta 6$ - and  $\alpha\beta 8$ -integrins, subtly ameliorates the immune phenotype of TGF $\beta$ 1-deficient mice. If so, this rescue effect might be absent in 6.3G9-treated *Itgb8*<sup>-/-</sup> mice, because  $\alpha\beta 6$  and  $\alpha\beta 8$  can activate TGF $\beta$ 3. In regard to this hypothesis, it is of interest to consider mice with a T-cell-specific deletion of the type II TGF $\beta$  receptor, because in these mice T cells would be unresponsive to all three TGF $\beta$  isoforms. In one of two reports on such mice, (CD4-Cre)Tgfb2<sup>fl/fl</sup> mice appear to have a slightly more aggressive inflammatory process than do *Tgfb1*-null mice (Li et al., 2006).

The finding that the inhibition of integrin  $\alpha\beta 6$  in *Itgb8*<sup>-/-</sup> mice initiated at P3 results in a much milder inflammatory syndrome than when inhibition is initiated at P0 or before birth remains unexplained, but might relate to dynamics of Treg development in the first few days of life. Classic experiments have shown that thymectomy on the third day of life (P2) leads to autoimmunity, whereas thymectomy on the first or seventh day (P0 or P6,

respectively) does not, suggesting suppressor cells are released from the thymus later than autoreactive cells (reviewed by Shevach et al., 2001). Rudensky's group has demonstrated a rapid increase in thymic Tregs in the first few days of life, with the biggest increase occurring at days 3-4 (Fontenot et al., 2005). Previous experiments have indicated that thymic Treg-cell development is largely independent of TGF $\beta$  (Marie et al., 2005; Marie et al., 2006). However, a recent report that describes mice in which TGF $\beta$  signaling is conditionally ablated in T cells by means of floxed *Tgfb1* alleles and Cre recombinase expressed under control of the CD4 promoter, has demonstrated that thymic Treg development is dramatically blocked at days P2-P4; by 1 week, thymic Treg-cell levels had normalized owing to expansion of Tregs in an IL2-dependent manner (Liu et al., 2008). CD4+CD25+Foxp3+ Tregs from these mice showed an activated phenotype and were defective in in-vitro suppressor assays. Thus, our results might indicate that sufficient numbers of normally functioning Tregs are released by P3 to suppress inflammation, but if TGF $\beta$  signaling is eliminated earlier, normal Tregs are not released and severe inflammation ensues.

The present findings complement our recent report on the phenotype of mice that lack integrin-responsive TGF $\beta$ 1 and totally lack TGF $\beta$ 3 (*Tgfb1*<sup>RGE/RGE</sup>; *Tgfb3*<sup>-/-</sup>). These mice showed the expected abnormalities seen in *Tgfb1*<sup>RGE/RGE</sup> or *Tgfb3*<sup>-/-</sup> mice, as well as one new abnormality not present in any TGF $\beta$  mutant mouse:

abnormal brain vascular morphogenesis that appears to be identical to that in mice that lack  $\alpha\text{v}\beta 8$  integrin (Zhu et al., 2002; Bader et al., 1998). Here, we show that mice that lack the function of both  $\alpha\text{v}\beta 6$ - and  $\alpha\text{v}\beta 8$ -integrin display abnormalities not seen in either of the two single-integrin-knockout mice that recapitulate the major abnormalities in *Tgfb3*-null mice (cleft palate) and *Tgfb1*-null mice (severe inflammation and lack of LCs). Taken together, these findings reveal a system in which two TGF $\beta$  isoforms and two TGF $\beta$  activators act cooperatively in several developmental processes.

## Materials and Methods

### Mice

*Itgb8*<sup>-/-</sup> mice were from Louis Reichardt (UCSF, San Francisco, CA) and had been backcrossed for at least six generations onto the ICR background (Charles River Laboratories, Boston, MA). *Itgb6*<sup>-/-</sup> mice on a C57BL/6J background were obtained from Dean Sheppard (University of California, San Francisco, CA) and were backcrossed three generations onto the ICR background before crossing with *Itgb8*<sup>-/-</sup> mice.

### Genotyping

PCR was carried out using primers specific for *Itgb8* wild-type and targeted alleles (mutant primers 5'-AGAGGCCACTTGTGTAGCGCCAAAG-3' and 5'-GGAGGCATACAGTCTAAATTGT-3' and wild-type primers 5'-ATTATCT-GTTTGTATGTGTCAGC-3' and 5'-AGAGAGGAACAATATCCTCTCCC-3'). The PCR protocol was 94°C for 4 minutes, 35 cycles of 94°C for 40 seconds, 56°C for 30 seconds and 72°C for 30 seconds, and 72°C for 7 minutes. For *Itgb6* wild-type and targeted alleles, PCR was carried out using primers flanking the insertion site of the neomycin-resistance gene (5'-TGTTAATGGCAAAATGTGCT-3' and 5'-CAG-TTCTGACATTGTTTCAG-3') and flanking *Itgb6* exon 4 (5'-GTGAGCA-GACTCTGCAAGTGC-3' and 5'-CTGCAAGGGTTGGTGATTCC-3'). PCR protocols were, for *Itgb6* wild-type allele, 94°C for 4 minutes, 32 cycles of 94°C for 30 seconds, 58°C for 30 seconds and 72°C for 50 seconds, and 72°C for 10 minutes and, for *Itgb6* KO allele, 94°C for 4 minutes, 35 cycles of 94°C for 30 seconds, 60°C for 30 seconds and 72°C for 20 seconds, and 72°C for 10 minutes.

### Treatments

Group 1 mice were treated at E16.5 and E18.5 by injecting pregnant females with 10 mg/kg 6.3G9 (or the control IgG1 monoclonal antibody 1E6) (Puthawala et al., 2008; Hahm et al., 2007; Weinreb et al., 2004). At birth, *Itgb8*<sup>-/-</sup> mice were identified by the presence of brain hemorrhage (confirmed by genotyping). Injections of 10 mg/kg into *Itgb8*<sup>-/-</sup> mice and littermate controls continued at P3 and then once a week. Group 2 mice were first injected on P0 and then once a week. Group 3 mice were first injected on P3 and then once a week. Mice were observed daily and sacrificed if moribund. Tissues were collected at death for histology. Two types of control mice were used for this experiment: control non-KO littermates that received the same injections of 6.3G9 as the *Itgb8*<sup>-/-</sup> mice, and *Itgb8*<sup>-/-</sup> mice treated with control IgG1 mAb. Non-KO mice receiving 6.3G9 were sacrificed when their 6.3G9-treated KO littermates died; no non-KO mice that had received 6.3G9 died before similarly treated KO littermates. The NYU School of Medicine animal care committee approved all procedures, which conformed to NIH guidelines.

### LC immunostaining

LCs in epidermal sheets were detected as described previously (Thomas et al., 2001; Yang et al., 2007). LC staining was performed on epidermal sheets isolated from backs of 6.3G9-treated *Itgb8*<sup>-/-</sup> mice at time of death and compared with samples from littermate non-KO control mice sacrificed at the same time. Epidermal sheets from seven *Itgb8*<sup>-/-</sup> and eight non-KO mice treated with 6.3G9 were stained. 6.3G9 treatment was started at E16.5.

### Flow cytometric analysis

Single-cell suspensions from spleen or thymus (after RBC lysis) were incubated with anti-CD4-FITC antibody with Mouse BD Fc Block (BD Biosciences), washed, incubated in permeabilization/fixation buffer, re-incubated with Fc Block and anti-Foxp3-PE antibody (eBioscience), washed, and analyzed using a FACScan flow cytometer (Becton Dickinson).

This work was funded by NIH grant R01 HL063786 and an Irma T. Hirschl Scholar Award from the Irma T. Hirschl/Monique Weill-Caulier Trusts (both to J.S.M.). We thank Paola Mita for help with Langerhans cell staining and Ezra Dweck for helpful discussions and technical assistance.

## References

- Annes, J. P., Rifkin, D. B. and Munger, J. S. (2002). The integrin  $\alpha\text{v}\beta 6$  binds and activates latent TGF $\beta 3$ . *FEBS Lett.* **511**, 65-68.
- Annes, J. P., Munger, J. S. and Rifkin, D. B. (2003). Making sense of latent TGF $\beta$  activation. *J. Cell Sci.* **116**, 217-224.
- Araya, J., Cambier, S., Morris, A., Finkbeiner, W. and Nishimura, S. L. (2006). Integrin-mediated transforming growth factor  $\beta$  activation regulates homeostasis of the pulmonary epithelial-mesenchymal trophic unit. *Am. J. Pathol.* **169**, 405-415.
- Araya, J., Cambier, S., Markovics, J. A., Wolters, P., Jablons, D., Hill, A., Finkbeiner, W., Jones, K., Broadus, V. C., Sheppard, D. et al. (2007). Squamous metaplasia amplifies pathologic epithelial-mesenchymal interactions in COPD patients. *J. Clin. Invest.* **117**, 3551-3562.
- Asano, Y., Ihn, H., Yamane, K., Jinnin, M., Mimura, Y. and Tamaki, K. (2005a). Increased expression of integrin  $\alpha\text{v}\beta 3$  contributes to the establishment of autocrine TGF- $\beta$  signaling in scleroderma fibroblasts. *J. Immunol.* **175**, 7708-7718.
- Asano, Y., Ihn, H., Yamane, K., Jinnin, M., Mimura, Y. and Tamaki, K. (2005b). Involvement of  $\alpha\text{v}\beta 5$  integrin-mediated activation of latent transforming growth factor  $\beta 1$  in autocrine transforming growth factor  $\beta$  signaling in systemic sclerosis fibroblasts. *Arthritis Rheum.* **52**, 2897-2905.
- Bader, B. L., Rayburn, H., Crowley, D. and Hynes, R. O. (1998). Extensive vasculogenesis, angiogenesis, and organogenesis precede lethality in mice lacking all  $\alpha\text{v}$  integrins. *Cell* **95**, 507-519.
- Borkowski, T. A., Letterio, J. J., Farr, A. G. and Udey, M. C. (1996). A role for endogenous transforming growth factor  $\beta 1$  in langerhans cell biology: the skin of transforming growth factor  $\beta 1$  null mice is devoid of epidermal langerhans cells. *J. Exp. Med.* **184**, 2417-2422.
- Fontenot, J. D., Gavin, M. A. and Rudensky, A. Y. (2003). Foxp3 programs the development and function of CD4+CD25+ regulatory T cells. *Nat. Immunol.* **4**, 330-336.
- Fontenot, J. D., Dooley, J. L., Farr, A. G. and Rudensky, A. Y. (2005). Developmental regulation of Foxp3 expression during ontogeny. *J. Exp. Med.* **202**, 901-906.
- Hahm, K., Lukashov, M. E., Luo, Y., Yang, W. J., Dolinski, B. M., Weinreb, P. H., Simon, K. J., Chun Wang, L., Leone, D. R., Lobb, R. R. et al. (2007).  $\alpha\text{v}\beta 6$  integrin regulates renal fibrosis and inflammation in alport mouse. *Am. J. Pathol.* **170**, 110-125.
- Horan, G. S., Wood, S., Ona, V., Li, D. J., Lukashov, M. E., Weinreb, P. H., Simon, K. J., Hahm, K., Allaire, N. E., Rinaldi, N. J. et al. (2007). Partial inhibition of integrin  $\alpha\text{v}\beta 6$  prevents pulmonary fibrosis without exacerbating inflammation. *Am. J. Respir. Crit. Care Med.* **177**, 56-65.
- Huang, X. Z., Wu, J. F., Cass, D., Erle, D. J., Corry, D., Young, S. G., Farese, R. V. and Sheppard, D. (1996). Inactivation of the integrin  $\beta 6$  subunit gene reveals a role of epithelial integrins in regulating inflammation in the lung and skin. *J. Cell Biol.* **133**, 921-928.
- Hynes, R. O. (2002). Integrins: bidirectional, allosteric signaling machines. *Cell* **110**, 673-687.
- Kaartinen, V., Voncken, J. W., Shuler, C., Warburton, D., Bu, D., Heisterkamp, N. and Groffen, J. (1995). Abnormal lung development and cleft palate in mice lacking TGF- $\beta 3$  indicates defects of epithelial-mesenchymal interaction. *Nat. Genet.* **11**, 415-421.
- Kojima, S., Nara, K. and Rifkin, D. B. (1993). Requirement for transglutaminase in the activation of latent transforming growth factor- $\beta$  in bovine endothelial cells. *J. Cell Biol.* **121**, 439-448.
- Koth, L. L., Alex, B. T., Hawgood, S., Nead, M. A., Sheppard, D., Erle, D. J. and Morris, D. G. (2007). Integrin  $\beta 6$  mediates phospholipid and collectin homeostasis by activation of latent TGF $\beta 1$ . *Am. J. Respir. Cell Mol. Biol.* **37**, 651-659.
- Kulkarni, A. B., Huh, C. G., Becker, D., Geiser, A., Lyght, M., Flanders, K. C., Roberts, A. B., Sporn, M. B., Ward, J. M. and Karlsson, S. (1993). Transforming growth factor  $\beta 1$  null mutation in mice causes excessive inflammatory response and early death. *Proc. Natl. Acad. Sci. USA* **90**, 770-774.
- Li, M. O., Sanjabi, S. and Flavell, R. A. (2006). Transforming growth factor- $\beta$  controls development, homeostasis, and tolerance of T cells by regulatory T cell-dependent and -independent mechanisms. *Immunity* **25**, 455-471.
- Liu, Y., Zhang, P., Li, J., Kulkarni, A. B., Perruche, S. and Chen, W. (2008). A critical function for TGF $\beta$  signaling in the development of natural CD4+CD25+Foxp3+ regulatory T cells. *Nat. Immunol.* **9**, 632-640.
- Lu, M., Munger, J. S., Steadale, M., Busald, C., Tellier, M. and Schnapp, L. M. (2002). Integrin  $\alpha 8\beta 1$  mediates adhesion to LAP-TGF $\beta 1$ . *J. Cell Sci.* **115**, 4641-4648.
- Ludbrook, S. B., Barry, S. T., Delves, C. J. and Horgan, C. M. (2003). The integrin  $\alpha\text{v}\beta 3$  is a receptor for the latency-associated peptides of transforming growth factors  $\beta 1$  and  $\beta 3$ . *Biochem. J.* **369**, 311-318.
- Marie, J. C., Letterio, J. J., Gavin, M. and Rudensky, A. Y. (2005). TGF- $\beta 1$  maintains suppressor function and Foxp3 expression in CD4+CD25+ regulatory T cells. *J. Exp. Med.* **201**, 1061-1067.
- Marie, J. C., Liggitt, D. and Rudensky, A. Y. (2006). Cellular mechanisms of fatal early-onset autoimmunity in mice with the T cell-specific targeting of transforming growth factor- $\beta$  receptor. *Immunity* **25**, 441-454.
- McCarthy, J. H., Lacy-Hulbert, A., Charest, A., Bronson, R. T., Crowley, D., Housman, D., Savill, J., Roes, J. and Hynes, R. O. (2005). Selective ablation of  $\alpha\text{v}$  integrins in the central nervous system leads to cerebral hemorrhage, seizures, axonal degeneration and premature death. *Development* **132**, 165-176.
- Morris, D. G., Huang, X., Kaminski, N., Wang, Y., Shapiro, S. D., Dolganov, G., Glick, A. and Sheppard, D. (2003). Loss of integrin  $\alpha\text{v}\beta 6$ -mediated TGF- $\beta$  activation causes Mmp12-dependent emphysema. *Nature* **422**, 169-173.
- Mu, D., Cambier, S., Fjellbirkeland, L., Baron, J. L., Munger, J. S., Kawakatsu, H., Sheppard, D., Broadus, V. C. and Nishimura, S. L. (2002). The integrin  $\alpha\text{v}\beta 8$

- mediates epithelial homeostasis through MT1-MMP-dependent activation of TGF- $\beta$ 1. *J. Cell Biol.* **157**, 493-507.
- Mu, Z., Yang, Z., Yu, D., Zhao, Z. and Munger, J. S. (2008). TGF $\beta$ 1 and TGF $\beta$ 3 are partially redundant effectors in brain vascular morphogenesis. *Mech. Dev.* **125**, 508-516.
- Munger, J. S., Harpel, J. G., Giancotti, F. G. and Rifkin, D. B. (1998). Interactions between growth factors and integrins: latent forms of transforming growth factor- $\beta$  are ligands for the integrin  $\alpha$ v $\beta$ 1. *Mol. Biol. Cell* **9**, 2627-2638.
- Munger, J. S., Huang, X., Kawakatsu, H., Griffiths, M. J., Dalton, S. L., Wu, J., Pittet, J. F., Kaminski, N., Garat, C., Matthay, M. A. et al. (1999). The integrin  $\alpha$ v $\beta$ 6 binds and activates latent TGF $\beta$ 1: a mechanism for regulating pulmonary inflammation and fibrosis. *Cell* **96**, 319-328.
- Nishimura, S. L., Boylen, K. P., Einheber, S., Milner, T. A., Ramos, D. M. and Pytela, R. (1998). Synaptic and glial localization of the integrin  $\alpha$ v $\beta$ 8 in mouse and rat brain. *Brain Res.* **791**, 271-282.
- Proctor, J. M., Zang, K., Wang, D., Wang, R. and Reichardt, L. F. (2005). Vascular development of the brain requires  $\beta$ 8 integrin expression in the neuroepithelium. *J. Neurosci.* **25**, 9940-9948.
- Proetzel, G., Pawlowski, S. A., Wiles, M. V., Yin, M., Boivin, G. P., Howles, P. N., Ding, J., Ferguson, M. W. and Doetschman, T. (1995). Transforming growth factor- $\beta$ 3 is required for secondary palate fusion. *Nat. Genet.* **11**, 409-414.
- Puthawala, K., Hadjiangelis, N., Jacoby, S. C., Bayongan, E., Zhao, Z., Yang, Z., Devitt, M. L., Horan, G. S., Weinreb, P. H., Lukashev, M. E. et al. (2008). Inhibition of integrin  $\alpha$ v $\beta$ 6, an activator of latent transforming growth factor- $\beta$ , prevents radiation-induced lung fibrosis. *Am. J. Respir. Crit. Care Med.* **177**, 82-90.
- Rubtsov, Y. P. and Rudensky, A. Y. (2007). TGF $\beta$  signalling in control of T-cell-mediated self-reactivity. *Nat. Rev. Immunol.* **7**, 443-453.
- Sakaguchi, S. (2004). Naturally arising CD4<sup>+</sup> regulatory t cells for immunologic self-tolerance and negative control of immune responses. *Annu. Rev. Immunol.* **22**, 531-562.
- Sanford, L. P., Ormsby, I., Gittenberger-de Groot, A. C., Sariola, H., Friedman, R., Boivin, G. P., Cardell, E. L. and Doetschman, T. (1997). TGF $\beta$ 2 knockout mice have multiple developmental defects that are non-overlapping with other TGF $\beta$  knockout phenotypes. *Development* **124**, 2659-2670.
- Sheppard, D. (2005). Integrin-mediated activation of latent transforming growth factor  $\beta$ . *Cancer Metastasis Rev.* **24**, 395-402.
- Shevach, E. M., McHugh, R. S., Piccirillo, C. A. and Thornton, A. M. (2001). Control of T cell activation by CD4<sup>+</sup>CD25<sup>+</sup> suppressor T cells. *Immunol. Rev.* **182**, 58-67.
- Shull, M. M., Ormsby, I., Kier, A. B., Pawlowski, S., Diebold, R. J., Yin, M., Allen, R., Sidman, C., Proetzel, G. and Calvin, D. (1992). Targeted disruption of the mouse transforming growth factor- $\beta$ 1 gene results in multifocal inflammatory disease. *Nature* **359**, 693-699.
- Thomas, R. M., Belsito, D. V., Huang, C., Chen, L. Z., Ormsby, I., Simmons, W. J., Cowin, P., Shaw, J., Doetschman, T. and Thorbecke, G. J. (2001). Appearance of langerhans cells in the epidermis of Tgf $\beta$ 1(-/-) SCID mice: paracrine and autocrine effects of transforming growth factor- $\beta$ 1 and - $\beta$ 2(1). *J. Invest. Dermatol.* **117**, 1574-1580.
- Travis, M. A., Reizis, B., Melton, A. C., Masteller, E., Tang, Q., Proctor, J. M., Wang, Y., Bernstein, X., Huang, X., Reichardt, L. F. et al. (2007). Loss of integrin  $\alpha$ v $\beta$ 8 on dendritic cells causes autoimmunity and colitis in mice. *Nature* **449**, 361-365.
- Wan, Y. Y. and Flavell, R. A. (2007). 'Yin-yang' functions of transforming growth factor- $\beta$  and T regulatory cells in immune regulation. *Immunol. Rev.* **220**, 199-213.
- Weinreb, P. H., Simon, K. J., Rayhorn, P., Yang, W. J., Leone, D. R., Dolinski, B. M., Pearce, B. R., Yokota, Y., Kawakatsu, H., Atakilit, A. et al. (2004). Function-blocking integrin  $\alpha$ v $\beta$ 6 monoclonal antibodies: distinct ligand-mimetic and nonligand-mimetic classes. *J. Biol. Chem.* **279**, 17875-17887.
- Wipff, P. J., Rifkin, D. B., Meister, J. J. and Hinz, B. (2008). Myofibroblast contraction activates latent TGF $\beta$ 1 from the extracellular matrix. *J. Cell Biol.* **179**, 1311-1323.
- Yang, X., Letterio, J. J., Lechleider, R. J., Chen, L., Hayman, R., Gu, H., Roberts, A. B. and Deng, C. (1999). Targeted disruption of SMAD3 results in impaired mucosal immunity and diminished T cell responsiveness to TGF- $\beta$ . *EMBO J.* **18**, 1280-1291.
- Yang, Z., Mu, Z., Dabovic, B., Jurukovski, V., Yu, D., Sung, J., Xiong, X. and Munger, J. S. (2007). Absence of integrin-mediated TGF $\beta$ 1 activation *in vivo* recapitulates the phenotype of TGF $\beta$ 1-null mice. *J. Cell Biol.* **176**, 787-793.
- Yu, Q. and Stamenkovic, I. (2000). Cell surface-localized matrix metalloproteinase-9 proteolytically activates TGF- $\beta$  and promotes tumor invasion and angiogenesis. *Genes Dev.* **14**, 163-176.
- Zhu, J., Motejlek, K., Wang, D., Zang, K., Schmidt, A. and Reichardt, L. F. (2002).  $\beta$ 8 integrins are required for vascular morphogenesis in mouse embryos. *Development* **129**, 2891-2903.
